# Supplementary material
Source: Royal Society of Chemistry journal article supplement (doi:10.1039/d6cp00943c)
Supplement: d6cp00943c1.pdf [file d6cp00943c1.pdf]

## Supporting Information:

# MFCC-DFT Mapping of Ligand Recognition at the 5-HT<sub>2A</sub> Receptor: Energetic Analysis of the Interactions Between Serotonin, Psychedelics, and Antipsychotic

Washington Sales Clemente Junior,<sup>†</sup> Katyanna Sales Bezerra, <sup>†</sup> Érika  
Geicianny de Carvalho Matias,<sup>†</sup> Jonas Ivan Nobre Oliveira, <sup>†</sup> and  
Umberto Laino Fulco\*,<sup>†</sup>

*<sup>†</sup>Departamento de Biofísica e Farmacologia, Universidade Federal do Rio Grande do  
Norte, 59072-970, Natal-RN, Brazil.*

\*E-mail: [umbertofulco@gmail.com](mailto:umbertofulco@gmail.com) Phone:

+55 (84) 3215-3419. Fax: +55 (84) 3215-3791

Table S1: Description of the 5-HT<sub>2</sub>AR residues interacting with Serotonin (5-HT) identified in the binding pocket radius ranging from 2.0 to 10.0 Å. We also show the regions and groups where there is Serotonin-residue interaction, and the energetic values (in kcal/mol) for  $\epsilon=10$  and  $\epsilon=40$  calculated by B97D functional combined with the 6-311+G(d,p) basis-set.

| 5-HT-5-HT <sub>2</sub> AR Complex |              |            |                          |                          |
|-----------------------------------|--------------|------------|--------------------------|--------------------------|
| Residue                           | Atomic Group | Radius (Å) | Energy ( $\epsilon=10$ ) | Energy ( $\epsilon=40$ ) |
| ASP155                            | II(C1)H      | 2          | -14,95                   | -7,50                    |
| ILE152                            | I(C4)H       | 2,5        | -3,35                    | -2,66                    |
| VAL156                            | II(C1)H      | 2,5        | -1,85                    | -1,74                    |
| PHE339                            | I(C8)H       | 2,5        | -2,59                    | -2,42                    |
| LEU362                            | I(C8)H       | 2,5        | -1,30                    | -1,12                    |
| TRP151                            | I(C4)H       | 3          | -4,82                    | -4,33                    |
| LEU228                            | I(C8)H       | 3          | -3,84                    | -4,02                    |
| LEU229                            | II(C2)H      | 3          | -2,99                    | -2,83                    |
| ASN363                            | I(C9)H       | 3          | -1,18                    | -0,87                    |
| CYS227                            | I(C4)H       | 3,5        | -1,45                    | -1,28                    |
| TYR370                            | II(C1)H      | 3,5        | -0,50                    | -0,79                    |
| TRP336                            | II(C1)H      | 4          | -0,77                    | -0,56                    |
| THR134                            | I(C10)H      | 4,5        | 0,02                     | -0,16                    |
| ASN343                            | I(C8)H       | 4,5        | -0,41                    | -0,49                    |
| VAL366                            | II(C1)H      | 4,5        | -1,47                    | -1,41                    |
| VAL127                            | II(C1)H      | 5          | -0,25                    | -0,26                    |
| TYR139                            | I(C9)H       | 5          | -0,27                    | -0,24                    |
| SER159                            | II(C1)H      | 5          | 0,01                     | -0,10                    |
| SER131                            | I(C10)H      | 5,5        | -0,19                    | -0,24                    |
| TRP141                            | I(C4)H       | 5,5        | -0,16                    | -0,15                    |
| ILE210                            | II(C2)H      | 5,5        | -0,05                    | -0,13                    |
| VAL235                            | II(C2)H      | 5,5        | -0,29                    | -0,19                    |
| GLY359                            | I(C8)O       | 5,5        | -0,25                    | -0,15                    |
| LEU123                            | II(C1)H      | 6          | -0,16                    | -0,10                    |
| CYS148                            | I(C4)H       | 6          | -0,57                    | -0,26                    |
| TYR153                            | I(C4)H       | 6          | -0,33                    | -0,18                    |
| LEU157                            | II(C1)H      | 6          | -0,07                    | -0,08                    |
| SER226                            | I(C9)H       | 6          | 0,06                     | -0,13                    |
| PHE243                            | II(C1)H      | 6          | -0,16                    | -0,10                    |
| VAL130                            | I(C4)H       | 6,5        | 0,14                     | -0,02                    |
| LEU154                            | II(C1)H      | 6,5        | 0,68                     | 0,37                     |
| ALA230                            | II(C2)H      | 6,5        | -0,11                    | -0,09                    |
| ILE358                            | I(C8)H       | 6,5        | -0,17                    | -0,08                    |
| PHE365                            | I(C8)H       | 6,5        | 0,08                     | -0,05                    |
| ALA149                            | I(C4)H       | 7          | -0,29                    | -0,11                    |
| PHE158                            | II(C1)H      | 7          | 0,40                     | 0,07                     |

|        |         |     |       |       |
|--------|---------|-----|-------|-------|
| LEU361 | I(C8)H  | 7   | 0,00  | -0,02 |
| ILE135 | I(C10)H | 7,5 | 0,06  | -0,02 |
| VAL150 | I(C4)H  | 7,5 | -0,11 | -0,04 |
| THR160 | II(C1)H | 7,5 | -0,05 | -0,03 |
| VAL221 | I(C4)H  | 7,5 | -0,31 | -0,16 |
| THR342 | I(C8)H  | 7,5 | 0,16  | 0,02  |
| ALA346 | I(C8)H  | 7,5 | 0,12  | 0,01  |
| VAL364 | I(C8)H  | 7,5 | -0,08 | -0,05 |
| SER207 | II(C1)H | 8   | -0,22 | -0,07 |
| LYS223 | I(C9)H  | 8   | 1,75  | 0,39  |
| ASP231 | II(C2)H | 8   | -2,53 | -0,65 |
| PHE234 | II(C2)H | 8   | 0,00  | -0,03 |
| SER239 | II(C1)H | 8   | -0,12 | -0,04 |
| PHE340 | II(C1)H | 8   | -0,21 | -0,08 |
| ALA360 | I(C9)H  | 8   | -0,06 | -0,03 |
| TRP367 | I(C10)H | 8   | -0,22 | -0,13 |
| GLY369 | II(C1)H | 8   | 0,16  | 0,03  |
| MET128 | II(C1)H | 8,5 | -0,24 | -0,10 |
| MET132 | I(C10)H | 8,5 | -0,03 | -0,02 |
| LEU147 | I(C4)H  | 8,5 | -0,11 | -0,04 |
| LYS220 | II(C2)H | 8,5 | 1,69  | 0,40  |
| PRO142 | I(C10)H | 9   | 0,10  | 0,02  |
| PHE222 | I(C4)H  | 9   | -0,12 | -0,07 |
| GLY238 | II(C1)H | 9   | 0,13  | 0,03  |
| PRO338 | I(C8)H  | 9   | 0,12  | 0,03  |
| ILE344 | I(C8)H  | 9   | -0,03 | -0,03 |
| LEU126 | I(C4)H  | 9,5 | 0,13  | 0,02  |
| LEU133 | I(C10)H | 9,5 | 0,15  | 0,03  |
| ARG140 | I(C10)H | 9,5 | 1,86  | 0,44  |
| LEU143 | I(C4)H  | 9,5 | 0,03  | 0,00  |
| LYS162 | II(C1)H | 9,5 | 2,94  | 0,73  |
| GLY225 | I(C10)H | 9,5 | 0,02  | 0,00  |
| ASP232 | II(C2)H | 9,5 | -2,45 | -0,62 |
| SER242 | II(C1)H | 9,5 | 0,07  | 0,01  |
| PHE332 | II(C1)H | 9,5 | -0,16 | -0,05 |
| VAL347 | I(C8)H  | 9,5 | 0,04  | 0,00  |
| GLU355 | I(C8)O  | 9,5 | -1,75 | -0,44 |
| PRO129 | I(C4)H  | 10  | 0,04  | 0,00  |
| GLY138 | I(C9)H  | 10  | 0,07  | 0,01  |
| ALA161 | II(C1)H | 10  | 0,14  | 0,04  |
| PRO211 | II(C2)H | 10  | -0,03 | -0,02 |
| LEU236 | II(C1)H | 10  | -0,15 | -0,05 |
| ASP356 | I(C8)O  | 10  | -1,66 | -0,42 |
| VAL357 | I(C8)H  | 10  | -0,05 | -0,02 |
| ILE368 | I(C8)H  | 10  | 0,14  | 0,02  |

---

Table S2: Description of the 5-HT<sub>2</sub>AR residues interacting with Psilocybin (PSCILO) identified in the binding pocket radius ranging from 2.0 to 10.0 Å. We also show the regions and groups where there is Psilocybin-residue interaction, and the energetic values (in kcal/mol) for  $\epsilon=10$  and  $\epsilon=40$  calculated by B97D functional combined with the 6-311+G(d,p) basis-set.

| PSCILO-5-HT <sub>2</sub> AR Complex |              |            |                          |                          |
|-------------------------------------|--------------|------------|--------------------------|--------------------------|
| Residue                             | Atomic Group | Radius (Å) | Energy ( $\epsilon=10$ ) | Energy ( $\epsilon=40$ ) |
| ASP155                              | II(C1)H      | 2          | -20,59                   | -13,06                   |
| PHE339                              | I(C9)O       | 2          | -6,82                    | -6,68                    |
| VAL156                              | II(C2)H      | 2,5        | -1,76                    | -1,77                    |
| TRP336                              | II(C1)H      | 2,5        | -1,68                    | -1,22                    |
| ASN363                              | I(C12)H      | 2,5        | -1,74                    | -1,25                    |
| VAL366                              | II(C3)H      | 2,5        | -2,94                    | -2,86                    |
| ASN343                              | I(C10)H      | 3          | -1,55                    | -1,54                    |
| LEU362                              | I(C11)H      | 3          | -2,89                    | -2,69                    |
| SER159                              | II(C1)H      | 3,5        | -0,50                    | -0,88                    |
| LEU228                              | I(C10)H      | 3,5        | -2,60                    | -2,78                    |
| TYR370                              | I(C3)H       | 3,5        | -1,42                    | -1,55                    |
| TRP151                              | I(C6)H       | 4          | -0,83                    | -0,66                    |
| LEU229                              | I(C9)O       | 4          | -1,74                    | -1,56                    |
| GLY359                              | I(C11)H      | 4          | -0,50                    | -0,32                    |
| ILE152                              | II(C4)H      | 4,5        | -1,19                    | -0,76                    |
| VAL235                              | I(C9)H       | 4,5        | -0,56                    | -0,45                    |
| SER131                              | I(C6)H       | 5          | 0,03                     | -0,13                    |
| PHE243                              | II(C2)H      | 5          | -0,43                    | -0,42                    |
| VAL127                              | II(C1)H      | 5,5        | -0,10                    | -0,16                    |
| THR134                              | I(C6)H       | 5,5        | 0,16                     | -0,01                    |
| TYR139                              | I(C12)H      | 5,5        | -0,16                    | -0,14                    |
| ILE358                              | I(C11)H      | 5,5        | -0,22                    | -0,14                    |
| GLY369                              | II(C1)H      | 5,5        | 0,13                     | -0,03                    |
| LEU123                              | II(C1)H      | 6          | -0,14                    | -0,12                    |
| ILE135                              | I(C6)H       | 6          | 0,05                     | -0,02                    |
| ILE210                              | II(C2)H      | 6          | 0,05                     | -0,05                    |
| CYS227                              | I(C6)N       | 6          | -0,48                    | -0,42                    |
| ALA346                              | I(C10)H      | 6          | 0,07                     | -0,03                    |
| VAL364                              | I(C12)H      | 6          | -0,19                    | -0,12                    |
| TRP367                              | I(C6)H       | 6          | -0,26                    | -0,25                    |
| LEU157                              | II(C2)H      | 6,5        | -0,07                    | -0,06                    |
| THR160                              | I(C11)H      | 6,5        | -0,14                    | -0,09                    |
| ALA230                              | I(C10)H      | 6,5        | -0,26                    | -0,16                    |
| PHE340                              | II(C1)H      | 6,5        | -0,20                    | -0,14                    |
| ALA360                              | I(C11)H      | 6,5        | -0,14                    | -0,06                    |
| LEU361                              | I(C12)H      | 6,5        | -0,15                    | -0,17                    |

|        |         |     |       |       |
|--------|---------|-----|-------|-------|
| LEU154 | II(C1)H | 7   | 0,35  | 0,20  |
| PHE158 | II(C1)H | 7   | 0,42  | 0,07  |
| SER226 | I(C12)H | 7   | 0,06  | -0,03 |
| PHE332 | II(C1)H | 7   | -0,21 | -0,09 |
| PHE365 | II(C3)H | 7   | -0,01 | -0,12 |
| MET128 | I(C6)H  | 7,5 | -0,22 | -0,09 |
| TYR153 | II(C2)H | 7,5 | -0,37 | -0,15 |
| SER239 | II(C2)H | 7,5 | -0,29 | -0,10 |
| THR342 | I(C11)H | 7,5 | 0,11  | -0,03 |
| VAL347 | I(C10)H | 7,5 | 0,02  | -0,02 |
| VAL130 | I(C6)H  | 8   | 0,15  | 0,02  |
| MET132 | I(C6)H  | 8   | -0,04 | -0,02 |
| LYS162 | II(C1)H | 8   | 3,21  | 0,78  |
| SER207 | II(C2)H | 8   | -0,25 | -0,08 |
| LYS223 | I(C11)H | 8   | 1,81  | 0,41  |
| ASP231 | I(C9)H  | 8   | -2,43 | -0,63 |
| SER242 | II(C2)H | 8   | 0,19  | 0,03  |
| ILE344 | I(C10)H | 8   | -0,10 | -0,08 |
| GLU355 | I(C11)H | 8   | -1,85 | -0,47 |
| TRP141 | I(C6)H  | 8,5 | -0,02 | -0,03 |
| CYS148 | II(C4)H | 8,5 | -0,20 | -0,07 |
| ILE163 | II(C1)H | 8,5 | 0,12  | 0,02  |
| VAL221 | I(C9)H  | 8,5 | -0,21 | -0,09 |
| ASP232 | I(C9)H  | 8,5 | -2,29 | -0,59 |
| GLY238 | II(C2)H | 8,5 | 0,06  | 0,00  |
| MET335 | II(C1)H | 8,5 | 0,09  | 0,04  |
| ASP356 | I(C11)H | 8,5 | -1,91 | -0,48 |
| VAL357 | I(C11)H | 8,5 | -0,08 | -0,03 |
| ILE368 | II(C1)H | 8,5 | 0,15  | 0,01  |
| LYS74  | I(C12)H | 9   | 2,15  | 0,53  |
| ALA149 | II(C4)H | 9   | -0,24 | -0,07 |
| ALA161 | II(C2)H | 9   | 0,16  | 0,03  |
| LYS220 | I(C9)H  | 9   | 1,60  | 0,38  |
| PHE234 | I(C9)H  | 9   | 0,00  | -0,03 |
| CYS337 | II(C1)H | 9   | -0,09 | -0,03 |
| PRO338 | II(C2)H | 9   | 0,10  | -0,02 |
| LYS350 | I(C10)H | 9   | 2,09  | 0,51  |
| LEU371 | II(C1)H | 9   | 0,07  | 0,02  |
| ASN372 | II(C1)H | 9   | 0,08  | 0,01  |
| SER373 | II(C1)H | 9   | -0,01 | -0,01 |
| LEU133 | I(C6)H  | 9,5 | 0,13  | 0,03  |
| LEU236 | I(C9)H  | 9,5 | -0,20 | -0,07 |
| ILE341 | II(C1)H | 9,5 | -0,02 | -0,01 |
| MET345 | I(C10)H | 9,5 | 0,16  | 0,03  |
| THR81  | I(C6)H  | 10  | -0,06 | -0,02 |

|        |         |    |       |       |
|--------|---------|----|-------|-------|
| ASP120 | II(C1)H | 10 | -2,91 | -0,74 |
| ARG140 | I(C12)H | 10 | 1,79  | 0,43  |
| VAL150 | II(C4)H | 10 | -0,10 | -0,03 |
| ILE206 | II(C2)H | 10 | 0,06  | 0,01  |
| PHE222 | I(C10)  | 10 | -0,06 | -0,04 |

---

Table S3: Description of the 5-HT<sub>2</sub>AR residues interacting with Lysergic Acid Diethylamide (LSD) identified in the binding pocket radius ranging from 2.0 to 10.0 Å. We also show the regions and groups where there is Lysergic Acid Diethylamide-residue interaction, and the energetic values (in kcal/mol) for  $\epsilon=10$  and  $\epsilon=40$  calculated by B97D functional combined with the 6-311+G(d,p) basis-set.

| LSD-5-HT <sub>2</sub> AR Complex |              |            |                          |                          |
|----------------------------------|--------------|------------|--------------------------|--------------------------|
| Residue                          | Atomic Group | Radius (Å) | Energy ( $\epsilon=10$ ) | Energy ( $\epsilon=40$ ) |
| ASP155                           | I(C11)H      | 2          | -24,19                   | -16,69                   |
| VAL127                           | II(C18)      | 2,5        | -1,34                    | -1,36                    |
| TRP151                           | II(C20)H     | 2,5        | -5,75                    | -5,39                    |
| VAL156                           | I(C15)H      | 2,5        | -6,36                    | -6,17                    |
| SER159                           | I(C15)H      | 2,5        | -2,03                    | -1,86                    |
| VAL235                           | I(C5)H       | 2,5        | -1,84                    | -1,63                    |
| SER242                           | I(C1)H       | 2,5        | -1,00                    | -1,00                    |
| TRP336                           | I(C12)H      | 2,5        | -2,10                    | -1,67                    |
| VAL366                           | I(C12)H      | 2,5        | -3,03                    | -2,72                    |
| SER131                           | II(C20)H     | 3          | -1,06                    | -1,26                    |
| ILE152                           | II(C18)H     | 3          | -2,31                    | -1,93                    |
| LEU229                           | I(C5)H       | 3          | -2,06                    | -2,04                    |
| GLY238                           | I(C4)H       | 3          | -2,16                    | -1,82                    |
| PHE339                           | I(C11)H      | 3          | -5,12                    | -5,02                    |
| TYR370                           | II(C17)H     | 3          | -1,97                    | -2,11                    |
| SER239                           | I(C4)H       | 3,5        | -1,92                    | -1,71                    |
| PHE340                           | I(C8)H       | 3,5        | -2,75                    | -2,70                    |
| ASN343                           | I(C5)H       | 3,5        | -1,05                    | -1,22                    |
| THR160                           | I(C8)H       | 4          | -0,88                    | -0,74                    |
| CYS227                           | II(C19)H     | 4          | -0,95                    | -0,78                    |
| LEU228                           | II(C19)H     | 4          | -0,92                    | -0,97                    |
| PHE234                           | I(C4)H       | 4          | -0,48                    | -0,37                    |
| LEU123                           | I(C12)H      | 4,5        | -0,56                    | -0,49                    |
| THR134                           | II(C20)H     | 5          | -0,17                    | -0,28                    |
| TYR139                           | II(C20)H     | 5          | -0,12                    | -0,15                    |
| ILE210                           | I(C4)        | 5          | -0,37                    | -0,46                    |
| PHE243                           | I(C8)H       | 5          | -0,50                    | -0,48                    |
| ASN363                           | II(C20)H     | 5          | -0,73                    | -0,41                    |
| TRP367                           | II(C20)H     | 5          | -0,59                    | -0,47                    |
| ILE163                           | I(C8)H       | 5,5        | 0,06                     | -0,06                    |
| GLY369                           | I(C12)H      | 5,5        | 0,12                     | -0,07                    |
| MET128                           | II(C17)H     | 6          | -0,30                    | -0,21                    |
| VAL130                           | II(C18)H     | 6          | 0,07                     | -0,12                    |
| ILE135                           | II(C20)H     | 6          | 0,02                     | -0,06                    |
| TRP141                           | II(C18)H     | 6          | -0,11                    | -0,12                    |
| CYS148                           | II(C18)H     | 6          | -0,37                    | -0,16                    |

|        |          |     |       |       |
|--------|----------|-----|-------|-------|
| TYR153 | II(C18)H | 6   | -0,34 | -0,23 |
| LEU154 | II(C18)H | 6   | 0,37  | 0,14  |
| LEU157 | I(C15)H  | 6   | -0,19 | -0,18 |
| PHE158 | I(C15)H  | 6   | 0,40  | 0,03  |
| ILE206 | I(C1)H   | 6   | 0,01  | -0,06 |
| LEU236 | I(C4)H   | 6   | -0,32 | -0,19 |
| ILE237 | I(C4)H   | 6   | -0,03 | -0,05 |
| LEU362 | II(C20)H | 6   | -0,65 | -0,42 |
| MET132 | II(C20)H | 6,5 | -0,07 | -0,07 |
| ASP231 | I(C5)H   | 6,5 | -2,13 | -0,57 |
| PHE240 | I(C4)H   | 6,5 | -0,18 | -0,11 |
| VAL241 | I(C1)H   | 6,5 | 0,23  | 0,07  |
| PHE332 | I(C8)H   | 6,5 | -0,28 | -0,14 |
| PHE365 | I(C12)H  | 6,5 | 0,06  | -0,02 |
| LEU126 | I(C18)H  | 7   | 0,19  | 0,03  |
| VAL150 | I(C18)H  | 7   | -0,15 | -0,10 |
| ALA161 | I(C8)H   | 7   | 0,06  | -0,01 |
| SER207 | I(C1)H   | 7   | -0,27 | -0,15 |
| ALA230 | I(C18)H  | 7   | -0,06 | -0,06 |
| ASP232 | I(C5)H   | 7   | -2,02 | -0,53 |
| LEU133 | I(C20)H  | 7,5 | 0,13  | 0,01  |
| LYS162 | I(C12)H  | 7,5 | 3,40  | 0,80  |
| TRP164 | I(C8)H   | 7,5 | 0,17  | 0,01  |
| SER226 | I(C19)H  | 7,5 | 0,06  | -0,03 |
| ASN233 | I(C4)H   | 7,5 | -0,02 | -0,04 |
| PHE244 | I(C1)H   | 7,5 | -0,07 | -0,07 |
| VAL347 | I(C5)H   | 7,5 | 0,03  | -0,01 |
| LEU147 | II(C18)H | 8   | -0,11 | -0,05 |
| ALA149 | II(C18)H | 8   | -0,28 | -0,11 |
| VAL221 | II(C19)H | 8   | -0,21 | -0,10 |
| ILE344 | I(C5)H   | 8   | -0,05 | -0,06 |
| VAL364 | II(C20)H | 8   | -0,14 | -0,07 |
| ILE368 | I(C12)H  | 8   | 0,14  | 0,00  |
| PRO129 | II(C20)H | 8,5 | -0,02 | -0,04 |
| SER203 | I(C8)H   | 8,5 | -0,20 | -0,07 |
| LYS220 | I(C5)H   | 8,5 | 1,64  | 0,38  |
| PRO246 | I(C8)H   | 8,5 | 0,14  | 0,02  |
| MET335 | I(C12)H  | 8,5 | 0,08  | 0,04  |
| GLY359 | I(C20)H  | 8,5 | -0,19 | -0,07 |
| LEU371 | I(C12)H  | 8,5 | 0,06  | 0,01  |
| ASN372 | I(C12)H  | 8,5 | 0,41  | 0,09  |
| SER373 | I(C12)H  | 8,5 | -0,01 | -0,02 |
| THR81  | II(C20)H | 9   | -0,10 | -0,04 |
| PRO142 | II(C19)H | 9   | 0,08  | -0,01 |
| LEU143 | II(C18)H | 9   | 0,01  | -0,01 |

|        |          |     |       |       |
|--------|----------|-----|-------|-------|
| PRO338 | I(C12)H  | 9   | 0,13  | 0,01  |
| ALA346 | I(C5)H   | 9   | 0,10  | 0,01  |
| ILE85  | I(C20)H  | 9,5 | -0,07 | -0,03 |
| ASP120 | I(C12)H  | 9,5 | -3,20 | -0,82 |
| LEU122 | II(C18)  | 9,5 | 0,05  | 0,00  |
| LEU136 | II(C20)H | 9,5 | 0,06  | 0,01  |
| ARG140 | II(C20)H | 9,5 | 1,43  | 0,34  |
| PRO209 | I(C4)H   | 9,5 | 0,09  | 0,00  |
| PHE222 | II(C19)H | 9,5 | -0,09 | -0,05 |
| LYS223 | II(C19)H | 9,5 | 1,64  | 0,39  |
| ILE245 | I(C1)H   | 9,5 | 0,10  | 0,02  |
| CYS337 | I(C12)H  | 9,5 | -0,14 | -0,05 |
| ILE341 | I(C11)H  | 9,5 | -0,02 | -0,03 |
| ALA360 | II(C20)H | 9,5 | -0,11 | -0,04 |
| LEU361 | II(C20)H | 9,5 | -0,06 | -0,04 |
| GLY124 | II(C17)H | 10  | -0,07 | -0,03 |
| PHE125 | II(C18)  | 10  | 0,08  | 0,01  |
| TYR137 | II(C20)H | 10  | 0,06  | 0,01  |
| GLY138 | II(C20)H | 10  | 0,09  | 0,02  |
| MET208 | I(C1)H   | 10  | -0,05 | -0,03 |
| THR342 | I(C12)H  | 10  | 0,10  | -0,01 |
| LYS350 | I(C5)H   | 10  | 1,77  | 0,43  |

---

Table S4: Description of the 5-HT<sub>2</sub>AR residues interacting with Lumateperone (LMTP) identified in the binding pocket radius ranging from 2.0 to 10.0 Å. We also show the regions and groups where there is Lumateperone-residue interaction, and the energetic values (in kcal/mol) for  $\epsilon=10$  and  $\epsilon=40$  calculated by B97D functional combined with the 6-311+G(d,p) basis-set.

| LMTP-5-HT <sub>2</sub> AR Complex |              |            |                          |                          |
|-----------------------------------|--------------|------------|--------------------------|--------------------------|
| Residue                           | Atomic Group | Radius (Å) | Energy ( $\epsilon=10$ ) | Energy ( $\epsilon=40$ ) |
| ASP155                            | I(C4)H       | 2          | -19,53                   | -12,09                   |
| VAL156                            | II(C5)H      | 2,5        | -1,93                    | -1,74                    |
| SER159                            | II(C6)H      | 2,5        | -3,61                    | -3,58                    |
| THR160                            | II(C13)H     | 2,5        | -1,51                    | -1,46                    |
| ILE163                            | II(C12)H     | 2,5        | -1,16                    | -1,25                    |
| LEU228                            | I(C24)H      | 2,5        | -6,21                    | -6,35                    |
| LEU229                            | I(C17)H      | 2,5        | -3,23                    | -3,09                    |
| SER242                            | II(C12)H     | 2,5        | 0,87                     | 1,11                     |
| PHE243                            | II(C11)F     | 2,5        | -2,58                    | -2,45                    |
| PHE332                            | II(C11)F     | 2,5        | -1,60                    | -1,41                    |
| PHE339                            | I(C14)H      | 2,5        | -7,06                    | -7,02                    |
| LEU362                            | I(C24)H      | 2,5        | -2,61                    | -2,54                    |
| ASN363                            | I(C23)H      | 2,5        | -2,08                    | -1,39                    |
| VAL366                            | I(C22)H      | 2,5        | -3,44                    | -3,38                    |
| PHE340                            | II(C10)H     | 3          | -3,68                    | -3,60                    |
| ASN343                            | I(C19)H      | 3          | -1,25                    | -1,45                    |
| TYR370                            | I(C3)H       | 3          | -2,06                    | -2,17                    |
| ILE152                            | I(C15)H      | 3,5        | -2,29                    | -1,92                    |
| VAL235                            | I(C18)H      | 3,5        | -0,90                    | -0,83                    |
| TRP336                            | I(C4)H       | 3,5        | -4,71                    | -4,30                    |
| GLY359                            | I(C24)H      | 3,5        | -1,02                    | -0,74                    |
| SER131                            | I(C2)H       | 4,5        | -0,19                    | -0,34                    |
| TRP151                            | I(C1)H       | 4,5        | -1,43                    | -1,23                    |
| CYS227                            | I(C22)H      | 4,5        | -1,13                    | -1,00                    |
| VAL127                            | I(C2)H       | 5          | -0,36                    | -0,35                    |
| LYS162                            | II(C11)F     | 5          | 2,63                     | 0,28                     |
| TRP164                            | II(C12)H     | 5          | -0,08                    | -0,22                    |
| ALA230                            | I(C18)H      | 5          | -0,17                    | -0,10                    |
| PRO246                            | I(C12)H      | 5          | -0,11                    | -0,19                    |
| ILE358                            | I(C24)H      | 5          | -0,32                    | -0,24                    |
| LEU123                            | II(C6)H      | 5,5        | -0,34                    | -0,27                    |
| LEU157                            | II(C7)O      | 5,5        | -0,20                    | -0,24                    |
| ILE210                            | II(C7)O      | 5,5        | -0,15                    | -0,21                    |
| GLY238                            | II(C13)H     | 5,5        | -0,14                    | -0,17                    |
| TYR139                            | I(C23)H      | 6          | -0,19                    | -0,21                    |
| PHE158                            | II(C6)H      | 6          | 0,14                     | -0,16                    |

|        |          |     |       |       |
|--------|----------|-----|-------|-------|
| ALA161 | II(C12)H | 6   | -0,01 | -0,10 |
| SER207 | II(C13)H | 6   | -0,27 | -0,17 |
| SER226 | I(C22)H  | 6   | 0,00  | -0,12 |
| SER239 | II(C13)H | 6   | -0,30 | -0,28 |
| ALA360 | I(C24)H  | 6   | -0,33 | -0,15 |
| LEU361 | I(C24)H  | 6   | -0,12 | -0,12 |
| VAL364 | I(C23)H  | 6   | -0,22 | -0,14 |
| PHE365 | I(C23)H  | 6   | -0,05 | -0,19 |
| TYR153 | II(C5)H  | 6,5 | -0,33 | -0,20 |
| LEU154 | II(C5)H  | 6,5 | 0,35  | 0,12  |
| LEU166 | II(C11)F | 6,5 | 0,04  | -0,03 |
| ILE206 | II(C13)H | 6,5 | -0,02 | -0,06 |
| LYS223 | I(C24)H  | 6,5 | 1,90  | 0,38  |
| ASP231 | I(C18)H  | 6,5 | -2,19 | -0,60 |
| VAL241 | II(C12)H | 6,5 | 0,07  | -0,02 |
| LEU247 | II(C11)F | 6,5 | -0,03 | -0,06 |
| VAL333 | II(C10)H | 6,5 | -0,29 | -0,13 |
| THR342 | I(C24)H  | 6,5 | 0,08  | -0,05 |
| TRP367 | I(C2)H   | 6,5 | -0,40 | -0,29 |
| GLY369 | I(C4)H   | 6,5 | 0,18  | -0,05 |
| MET128 | I(C3)H   | 7   | -0,29 | -0,14 |
| THR134 | I(C22)H  | 7   | -0,03 | -0,07 |
| SER203 | II(C12)H | 7   | -0,17 | -0,08 |
| VAL221 | I(C17)H  | 7   | -0,27 | -0,15 |
| ASP232 | I(C18)H  | 7   | -8,19 | -0,57 |
| PHE234 | I(C17)H  | 7   | -0,07 | -0,10 |
| PHE244 | II(C11)F | 7   | -0,09 | -0,09 |
| MET250 | II(C11)F | 7   | 0,02  | -0,02 |
| ALA346 | I(C24)H  | 7   | 0,08  | -0,01 |
| ILE135 | I(C22)H  | 7,5 | 0,00  | -0,04 |
| TRP141 | I(C21)H  | 7,5 | -0,05 | -0,06 |
| CYS148 | I(C15)H  | 7,5 | -0,30 | -0,12 |
| LYS220 | I(C18)H  | 7,5 | 1,55  | 0,35  |
| CYS337 | II(C10)H | 7,5 | -0,13 | -0,06 |
| GLU355 | I(C24)H  | 7,5 | -1,97 | -0,51 |
| ASN372 | II(C10)H | 7,5 | 0,14  | 0,01  |
| VAL130 | I(C2)H   | 8   | 0,17  | 0,01  |
| HIS165 | II(C11)F | 8   | 0,18  | 0,03  |
| PHE240 | II(C12)H | 8   | -0,07 | -0,06 |
| MET335 | II(C10)H | 8   | -0,04 | -0,06 |
| VAL347 | I(C18)H  | 8   | 0,01  | -0,02 |
| VAL357 | I(C24)H  | 8   | -0,11 | -0,05 |
| ALA149 | I(C15)H  | 8,5 | -0,25 | -0,09 |
| CYS167 | II(C11)F | 8,5 | 0,06  | 0,01  |
| LEU236 | I(C18)H  | 8,5 | -0,13 | -0,06 |

|        |          |     |       |       |
|--------|----------|-----|-------|-------|
| ILE245 | II(C12)H | 8,5 | 0,05  | -0,01 |
| ASP356 | I(C24)H  | 8,5 | -2,01 | -0,52 |
| ILE368 | I(C3)H   | 8,5 | 0,13  | 0,00  |
| LEU116 | II(C11)F | 9   | -0,15 | -0,05 |
| ASP120 | II(C10)H | 9   | -3,02 | -0,78 |
| MET132 | I(C2)H   | 9   | -0,08 | -0,04 |
| ILE202 | II(C12)H | 9   | -0,01 | -0,01 |
| PHE222 | I(C18)H  | 9   | -0,07 | -0,06 |
| ILE237 | II(C13)H | 9   | 0,02  | -0,02 |
| VAL334 | II(C10)H | 9   | -0,07 | -0,03 |
| PRO338 | I(C24)H  | 9   | 0,10  | -0,03 |
| ILE344 | I(C24)H  | 9   | -0,03 | -0,05 |
| ALA119 | II(C6)H  | 9,5 | -0,13 | -0,05 |
| VAL150 | I(C3)H   | 9,5 | -0,07 | -0,03 |
| VAL199 | II(C12)H | 9,5 | -0,06 | -0,02 |
| GLU224 | I(C24)H  | 9,5 | -1,86 | -0,47 |
| ASN233 | I(C18)H  | 9,5 | 0,06  | 0,00  |
| THR248 | II(C11)F | 9,5 | -0,01 | -0,01 |
| PHE329 | II(C11)F | 9,5 | -0,13 | -0,04 |
| LEU331 | II(C10)H | 9,5 | -0,09 | -0,04 |
| LEU371 | I(C3)H   | 9,5 | 0,05  | 0,00  |
| SER373 | II(C6)H  | 9,5 | -0,02 | -0,02 |
| LEU126 | I(C2)H   | 10  | 0,16  | 0,03  |
| PRO129 | I(C2)H   | 10  | 0,00  | -0,01 |
| GLY138 | I(C23)H  | 10  | 0,09  | 0,02  |
| ARG140 | I(C22)H  | 10  | 1,95  | 0,47  |
| MET208 | II(C7)O  | 10  | -0,08 | -0,03 |
| PRO209 | II(C7)O  | 10  | 0,08  | 0,01  |
| PRO211 | II(C5)H  | 10  | -0,02 | -0,02 |
| SER219 | I(C18)H  | 10  | -0,02 | -0,01 |
| ILE341 | II(C10)H | 10  | 0,01  | -0,01 |
| LYS350 | I(C19)H  | 10  | 1,71  | 0,41  |

---
